# Supplementary material
Source: PubMed Central journal article supplement (PMC3114247)
Supplement: neo1306_0537SD1.pdf [file neo1306_0537SD1.pdf]

**Table W1.** Radiation Doses That Reduce Cell Clonogenic Survival to 10% (D0.1) Calculated by Fitting the Linear Quadratic Equation to Clonogenic Survival after Treatment with Radiation Alone and in Combination with LY2109761 and/or TMZ.

| Cell  | Treatment     | D0.1 (Gy) | DEF  |
|-------|---------------|-----------|------|
| U87MG | RT alone      | 7.03      |      |
|       | RT + Ly       | 5.44      | 1.29 |
|       | RT + TMZ      | 5.76      | 1.22 |
|       | RT + Ly + TMZ | 4.67      | 1.51 |
| T98   | RT alone      | 6.15      |      |
|       | RT + Ly       | 4.97      | 1.24 |
|       | RT + TMZ      | 6.09      | 1.01 |
|       | RT + Ly + TMZ | 4.90      | 1.26 |

Dose enhancement factor (DEF) was defined as the quotient of D0.1 RT/D0.1 RT + drug(s). DEF greater than 1 indicates greater than independent toxicity in combined treatment. Ly indicates LY2109761.

**Table W2.** Effects of Each Treatment on TTP of U87MG and T98 Tumor Xenografts.

| Tumor Model | Group         | TTP (Mean $\pm$ SD; Days) | TTP Control (Days) |
|-------------|---------------|---------------------------|--------------------|
| U87MG       | Control       | 11.1 $\pm$ 1.79           |                    |
|             | Ly            | 32.0 $\pm$ 6.28           | 20.9               |
|             | TMZ           | 64.3 $\pm$ 9.14           | 53.2               |
|             | RT            | 29.7 $\pm$ 7.17           | 18.6               |
|             | Ly + TMZ      | 79.9 $\pm$ 7.15           | 68.8               |
|             | Ly + RT       | 62.1 $\pm$ 8.29           | 53.8               |
|             | TMZ + RT      | 75.4 $\pm$ 8.29           | 64.3               |
|             | Ly + TMZ + RT | 95.9 $\pm$ 2.39           | 84.8               |
| T98         | Control       | 10.1 $\pm$ 1.26           |                    |
|             | Ly            | 16.5 $\pm$ 2.53           | 6.4                |
|             | TMZ           | 11.9 $\pm$ 1.58           | 1.8                |
|             | RT            | 20.9 $\pm$ 4.32           | 10.8               |
|             | Ly + TMZ      | 18.1 $\pm$ 4.41           | 8.0                |
|             | Ly + RT       | 30.8 $\pm$ 6.16           | 20.7               |
|             | TMZ + RT      | 22.6 $\pm$ 5.07           | 12.5               |
|             | Ly + TMZ + RT | 34.3 $\pm$ 7.13           | 24.2               |

TTP is defined as the time when tumor volume increased three times from the baseline value for each mouse. TTP control is defined as TTP difference between each treatment group and control group. Ly indicates LY2109761.
